# Supplementary material for: Validation study of health administrative data algorithms to identify individuals experiencing homelessness and estimate population prevalence of homelessness in Ontario, Canada
Source: PubMed Central journal article supplement — BMJ Open. 2019 Oct 4;9(10):e030221. doi: 10.1136/bmjopen-2019-030221 (PMC6797366; doi:10.1136/bmjopen-2019-030221), 2019-10-04
Supplement: bmjopen-2019-030221supp001.pdf [file bmjopen-2019-030221supp001.pdf]

**Supplement Table 1 – Data Elements Indicative of Homelessness, Supportive Housing or Shelter Use**

| Database     | Variable Name                   | Indicator Value          | Description                                                                                       |
|--------------|---------------------------------|--------------------------|---------------------------------------------------------------------------------------------------|
| <b>DAD</b>   | HOMELESS                        | “Y”                      | Homelessness indicator                                                                            |
|              | INSTTYPE                        | “SH”                     | Institution Type = Supportive Housing                                                             |
|              | DX10CODE1 to DX10CODE25         | “Z590” or “Z591”         | ICD-10 diagnosis codes for “Homelessness” and “Inadequate housing”                                |
|              | CMGDIAG                         | “Z590” or “Z591”         | ICD-10 diagnosis codes for “Homelessness” and “Inadequate housing”                                |
|              | PSTLCODE                        | “XX”                     | Used to indicate transient/homeless patients                                                      |
| <b>NACRS</b> | DX10CODE1 to DX10CODE10         | “Z590” or “Z591”         | ICD-10 diagnosis codes for “Homelessness” and “Inadequate housing”                                |
|              | RESTYPE                         | “3” or “4”               | Residence Type = “Homeless” or “Shelter”                                                          |
|              | PSTLCODE                        | “XX”                     | Used to indicate transient/homeless patients                                                      |
| <b>OMHRS</b> | PREDX10CODE to PREDX10CODE11    | “Z590” or “Z591”         | ICD-10 diagnosis codes for “Homelessness” and “Inadequate housing”                                |
|              | POSTDX10CODE1 to POSTDX10CODE24 | “Z590” or “Z591”         | ICD-10 diagnosis codes for “Homelessness” and “Inadequate housing”                                |
|              | PRIOR_RESIDENCE                 | “6”                      | Prior residential status = “Homeless (with or without shelter)”                                   |
|              | USUAL_RESIDENCE                 | “8”                      | Usual residential status = “Homeless (with or without shelter)”                                   |
|              | ADMITFROM                       | “8”                      | Admitted from = “Homeless (with or without shelter)”                                              |
|              | DISCHLIVING                     | “8”                      | Living arrangement at discharge = “Homeless (with or without shelter)”                            |
|              | P5_Retired_2009                 | “6”                      | (Variable retired in 2009) Living arrangement = “Homeless (with or without shelter)”              |
|              | PSTLCODE                        | “XX”                     | Used to indicate transient/homeless patients                                                      |
| <b>HCD</b>   | DXCODE                          | “V600” or “V601”         | ICD-9 diagnosis codes for “Lack of housing” or “Inadequate housing”                               |
|              | REQUEST_PROGRAM                 | “6”                      | Program Requested = “Supportive Housing”                                                          |
|              | RESIDENCE_TYPE                  | “1604”, “2200” or “3400” | Residence Type = “Other Supportive Living Unit”, “Hostel/Shelter” or “No fixed address”           |
| <b>RAICA</b> | B4                              | “8”                      | Expected residential/living status during service provision = “Homeless (with / without shelter)” |
| <b>NRS</b>   | ALIVESET                        | “6”                      | Admission living setting = “Shelter”                                                              |
|              | FLIVESET                        | “6”                      | Follow-up living setting = “Shelter”                                                              |

| Database    | Variable Name             | Indicator Value | Description                                                            |
|-------------|---------------------------|-----------------|------------------------------------------------------------------------|
|             | PRIM_DISCH_WAIT_REASON    | "1.1"           | Primary Discharge Wait Reason = "Assisted Living/Supportive Housing"   |
|             | SECND_DISCH_WAIT_REASON   | "1.1"           | Secondary Discharge Wait Reason = "Assisted Living/Supportive Housing" |
| <b>CORR</b> | PROVINCE_CODE             | "XX"            | "Transient/Homeless"                                                   |
|             | HEALTH_CARD_PROVINCE_CODE | "XX"            | "Transient/Homeless"                                                   |

ICD=International Classification of Diseases

## Supplement Table 2: Description of Case Ascertainment Algorithms

| Name                            | Data Sources included <sup>1</sup>                   | Time Interval                                                  | Case Positive Condition(s)                                                                                    |
|---------------------------------|------------------------------------------------------|----------------------------------------------------------------|---------------------------------------------------------------------------------------------------------------|
| <b>1 indicator +/- 0 days</b>   | DAD<br>NACRS<br>OMHRS<br>CORR<br>RAICA<br>HCD<br>NRS | 0 days before the encounter start or after the encounter end   | 1 positive (“homeless”) indicator <sup>2</sup> in any of the included sources within the specified time frame |
| <b>1 indicator +/- 15 days</b>  | DAD<br>NACRS<br>OMHRS<br>CORR<br>RAICA<br>HCD<br>NRS | 15 days before the encounter start or after the encounter end  | 1 positive (“homeless”) indicator in any of the included sources within the specified time frame              |
| <b>1 indicator +/- 45 days</b>  | DAD<br>NACRS<br>OMHRS<br>CORR<br>RAICA<br>HCD<br>NRS | 45 days before the encounter start or after the encounter end  | 1 positive (“homeless”) indicator in any of the included sources within the specified time frame              |
| <b>1 indicator +/- 90 days</b>  | DAD<br>NACRS<br>OMHRS<br>CORR<br>RAICA<br>HCD<br>NRS | 90 days before the encounter start or after the encounter end  | 1 positive (“homeless”) indicator in any of the included sources within the specified time frame              |
| <b>1 indicator +/- 180 days</b> | DAD<br>NACRS<br>OMHRS<br>CORR<br>RAICA<br>HCD<br>NRS | 180 days before the encounter start or after the encounter end | 1 positive (“homeless”) indicator in any of the included sources within the specified time frame              |

| <b>Name</b>                                       | <b>Data Sources included<sup>1</sup></b>                              | <b>Time Interval</b>                                             | <b>Case Positive Condition(s)</b>                                                                                                                             |
|---------------------------------------------------|-----------------------------------------------------------------------|------------------------------------------------------------------|---------------------------------------------------------------------------------------------------------------------------------------------------------------|
| <b>1 indicator OR postal code<br/>+/- 0 days</b>  | DAD<br>NACRS<br>OMHRS<br>CORR<br>RAICA<br>HCD<br>NRS<br>ICES PSTLYEAR | 0 days before the encounter start or<br>after the encounter end  | 1 positive (“homeless”) indicator<br>in any of the included health<br>encounter sources or ICES<br>PSTLYEAR-matched facilities<br>providing shelter services. |
| <b>1 indicator OR postal code<br/>+/- 15 days</b> | DAD<br>NACRS<br>OMHRS<br>CORR<br>RAICA<br>HCD<br>NRS<br>ICES PSTLYEAR | 15 days before the encounter start<br>or after the encounter end | 1 positive (“homeless”) indicator<br>in any of the included health<br>encounter sources or ICES<br>PSTLYEAR-matched facilities<br>providing shelter services. |
| <b>1 indicator OR postal code<br/>+/- 45 days</b> | DAD<br>NACRS<br>OMHRS<br>CORR<br>RAICA<br>HCD<br>NRS<br>ICES PSTLYEAR | 45 days before the encounter start<br>or after the encounter end | 1 positive (“homeless”) indicator<br>in any of the included health<br>encounter sources or ICES<br>PSTLYEAR-matched facilities<br>providing shelter services. |
| <b>1 indicator OR postal code<br/>+/- 90 days</b> | DAD<br>NACRS<br>OMHRS<br>CORR<br>RAICA<br>HCD<br>NRS<br>ICES PSTLYEAR | 90 days before the encounter start<br>or after the encounter end | 1 positive (“homeless”) indicator<br>in any of the included health<br>encounter sources or ICES<br>PSTLYEAR-matched facilities<br>providing shelter services. |

| Name                                               | Data Sources included <sup>1</sup>                                    | Time Interval                                                  | Case Positive Condition(s)                                                                                                                        |
|----------------------------------------------------|-----------------------------------------------------------------------|----------------------------------------------------------------|---------------------------------------------------------------------------------------------------------------------------------------------------|
| <b>1 indicator OR postal code +/- 180 days</b>     | DAD<br>NACRS<br>OMHRS<br>CORR<br>RAICA<br>HCD<br>NRS<br>ICES PSTLYEAR | 180 days before the encounter start or after the encounter end | 1 positive (“homeless”) indicator in any of the included health encounter sources or ICES PSTLYEAR-matched facilities providing shelter services. |
| <b>1 CIHI indicator +/- 0 days</b>                 | DAD<br>NACRS<br>OMHRS                                                 | 0 days before the encounter start or after the encounter end   | 1 positive (“homeless”) indicator in any of the included sources within the specified time frame                                                  |
| <b>1 CIHI indicator +/- 15 days</b>                | DAD<br>NACRS<br>OMHRS                                                 | 15 days before the encounter start or after the encounter end  | 1 positive (“homeless”) indicator in any of the included sources within the specified time frame                                                  |
| <b>1 CIHI indicator +/- 45 days</b>                | DAD<br>NACRS<br>OMHRS                                                 | 45 days before the encounter start or after the encounter end  | 1 positive (“homeless”) indicator in any of the included sources within the specified time frame                                                  |
| <b>1 CIHI indicator +/- 90 days</b>                | DAD<br>NACRS<br>OMHRS                                                 | 90 days before the encounter start or after the encounter end  | 1 positive (“homeless”) indicator in any of the included sources within the specified time frame                                                  |
| <b>1 CIHI indicator +/- 180 days</b>               | DAD<br>NACRS<br>OMHRS<br>ICES PSTLYEAR                                | 180 days before the encounter start or after the encounter end | 1 positive (“homeless”) indicator in any of the included sources within the specified time frame                                                  |
| <b>1 CIHI indicator OR postal code +/- 0 days</b>  | DAD<br>NACRS<br>OMHRS<br>ICES PSTLYEAR                                | 0 days before the encounter start or after the encounter end   | 1 positive (“homeless”) indicator in any of the included health encounter sources or ICES PSTLYEAR-matched facilities providing shelter services. |
| <b>1 CIHI indicator OR postal code +/- 15 days</b> | DAD<br>NACRS<br>OMHRS<br>ICES PSTLYEAR                                | 15 days before the encounter start or after the encounter end  | 1 positive (“homeless”) indicator in any of the included health encounter sources or ICES PSTLYEAR-matched facilities providing shelter services. |

| Name                                                | Data Sources included <sup>1</sup>     | Time Interval                                                  | Case Positive Condition(s)                                                                                                                        |
|-----------------------------------------------------|----------------------------------------|----------------------------------------------------------------|---------------------------------------------------------------------------------------------------------------------------------------------------|
| <b>1 CIHI indicator OR postal code +/- 45 days</b>  | DAD<br>NACRS<br>OMHRS<br>ICES PSTLYEAR | 45 days before the encounter start or after the encounter end  | 1 positive (“homeless”) indicator in any of the included health encounter sources or ICES PSTLYEAR-matched facilities providing shelter services. |
| <b>1 CIHI indicator OR postal code +/- 90 days</b>  | DAD<br>NACRS<br>OMHRS<br>ICES PSTLYEAR | 90 days before the encounter start or after the encounter end  | 1 positive (“homeless”) indicator in any of the included health encounter sources or ICES PSTLYEAR-matched facilities providing shelter services. |
| <b>1 CIHI indicator OR postal code +/- 180 days</b> | DAD<br>NACRS<br>OMHRS<br>ICES PSTLYEAR | 180 days before the encounter start or after the encounter end | 1 positive (“homeless”) indicator in any of the included health encounter sources or ICES PSTLYEAR-matched facilities providing shelter services. |

1. Data sources are named and described in Supplement Table 3
2. indicators in each data sources are presented in Supplement Table 1

### Supplement Table 3: Databases Used

| Name                                                                               | Data Source                                      | Description                                                                                                                                                                                                                                                                                                                                                                                                                                                                                                                                                                                                                                                                                                                                                                                                                                                                                                                                                                                                                  |
|------------------------------------------------------------------------------------|--------------------------------------------------|------------------------------------------------------------------------------------------------------------------------------------------------------------------------------------------------------------------------------------------------------------------------------------------------------------------------------------------------------------------------------------------------------------------------------------------------------------------------------------------------------------------------------------------------------------------------------------------------------------------------------------------------------------------------------------------------------------------------------------------------------------------------------------------------------------------------------------------------------------------------------------------------------------------------------------------------------------------------------------------------------------------------------|
| <b>Health and Housing in Transition Study</b>                                      | Primary data collection                          | <p>A longitudinal study conducted from 2009-2014 in three Canadian cities (Toronto, Ontario; Ottawa, Ontario; and Vancouver, British Columbia) aiming to assess the impact of housing transitions on health. Participants were randomly selected at shelters, meal programmes, community health centres, drop-in centres, rooming houses, and single-room occupancy hotels from January to December 2009 and were interviewed every 12 months.</p> <p>Data on housing status were initially classified into one of 25 types of residence, which were then further classified into one of three mutually exclusive residence categories: housed, institution or homeless. To determine if periods of time spent in institutions (e.g. hospitals, prison, etc.) should be considered periods of homelessness or housing, housing status prior and subsequent to the period of institutionalization were reviewed, and institution housing episodes flanked by any period of homelessness was also considered homelessness.</p> |
| <b>Canadian Institute for Health Information Discharge Abstract Database (DAD)</b> | Canadian Institute for Health Information (CIHI) | The DAD contains administrative, clinical (diagnoses and procedures/interventions), demographic, and administrative information for all admissions to acute care hospitals in Ontario. At ICES, consecutive DAD records are linked together to form 'episodes of care' among the hospitals to which patients have been transferred after their initial admission                                                                                                                                                                                                                                                                                                                                                                                                                                                                                                                                                                                                                                                             |
| <b>Ontario Mental Health Reporting System (OMHRS)</b>                              | Canadian Institute for Health Information (CIHI) | The OMHRS contains administrative, clinical (diagnoses and procedures), demographic, and administrative information for all admissions to adult designated inpatient mental health beds. This includes beds in general hospitals, provincial psychiatric facilities, and specialty psychiatric facilities. Clinical assessment data is ascertained using the Resident Assessment Instrument for Mental Health (RAI-MH), but different amounts of information are collected using this instrument depending on the length of stay in the mental health bed. Multiple assessments may occur during the length of a mental health admission.                                                                                                                                                                                                                                                                                                                                                                                    |
| <b>National Ambulatory Care Reporting System (NACRS)</b>                           | Canadian Institute for Health Information (CIHI) | The NACRS contains administrative, clinical (diagnoses and procedures), demographic, and administrative information for all patient visits made to hospital- and community-based ambulatory care centres (emergency departments, day surgery units, hemodialysis units, and cancer care clinics) in Ontario. At ICES, NACRS records are linked with other data sources (DAD, Ontario Mental Health Reporting System [OMHRS]) to identify transitions to other care settings, such as inpatient acute care or psychiatric care.                                                                                                                                                                                                                                                                                                                                                                                                                                                                                               |

| <b>Name</b>                                                               | <b>Data Source</b>                                   | <b>Description</b>                                                                                                                                                                                                                                                                                                                                                                                                                                                                                                                                                                                     |
|---------------------------------------------------------------------------|------------------------------------------------------|--------------------------------------------------------------------------------------------------------------------------------------------------------------------------------------------------------------------------------------------------------------------------------------------------------------------------------------------------------------------------------------------------------------------------------------------------------------------------------------------------------------------------------------------------------------------------------------------------------|
| <b>Home Care Database (HCD)</b>                                           | Ontario Association of Community Care Access Centres | The Home Care Database contains administrative data about the patients, episodes, and services who receive home care through CCACs. The data included here is extracted from the CCAC administrative data system (CHRIS).                                                                                                                                                                                                                                                                                                                                                                              |
| <b>Resident Assessment Instrument Contact Assessment Database (RAICA)</b> | Ontario Association of Community Care Access Centres | The interRAIContact Assessment (interRAICA) is a short screening assessment completed for adults at the time of intake to CCAC service (i.e. home care and / or palliative care) from community or hospital (including ED). It was designed to support decision-making about the urgency for immediate service provision, record essential clinical information on persons who would not be receiving comprehensive assessment at a later stage, and provide the minimum clinical information to enable short-term services to be put in place before completion of a full RAI assessment (ie. RAI-HC) |
| <b>National Rehabilitation Reporting System (NRS)</b>                     | Ministry of Health and Long-Term Care                | The National Rehabilitation Reporting System (NRS) contains client data collected from participating adult inpatient rehabilitation facilities and programs across Canada. Data elements include socio-demographic information, administrative data, patient health characteristics, activities and participation and interventions.                                                                                                                                                                                                                                                                   |
| <b>Canadian Organ Replacement Registry (CORR)</b>                         | Canadian Institute for Health Information (CIHI)     | The Ontario portion of the Canadian Organ Replacement Register (CORR) records activity and outcomes of vital organ transplantation and renal dialysis activities.                                                                                                                                                                                                                                                                                                                                                                                                                                      |
| <b>ICES-derived PSTLYEAR database</b>                                     | ICES;<br>Ministry of Health and Long-Term Care       | The ICES-derived PSTLYEAR database contains the best known postal code for persons in the OHIP Registered Persons Database on July 1 <sup>st</sup> of each year starting from year 1991. Postal codes supplied by the Ministry of Health and Long-Term Care are enriched with information in CIHI and other ICES-housed datasets to take advantage of the postal code information recorded each time an individual accesses certain healthcare services.                                                                                                                                               |
| <b>OHIP Registered Persons Database</b>                                   | Ministry of Health and Long-Term Care                | The OHIP RPDB provides basic demographic information (age, sex, location of residence, date of birth, and date of death for deceased individuals) for those issued an Ontario health insurance number. The RPDB also indicates the time periods for which an individual was eligible to receive publicly funded health insurance benefits and provides the best known postal code for each registrant on July 1st of each year.                                                                                                                                                                        |



| <b>Name</b>                                                                               | <b>Data Source</b>                           | <b>Description</b>                                                                                                                                                                                                                                                                                                                                                                                                                                                                                                                                                                                                                                           |
|-------------------------------------------------------------------------------------------|----------------------------------------------|--------------------------------------------------------------------------------------------------------------------------------------------------------------------------------------------------------------------------------------------------------------------------------------------------------------------------------------------------------------------------------------------------------------------------------------------------------------------------------------------------------------------------------------------------------------------------------------------------------------------------------------------------------------|
| <b>Ontario Health Insurance Plan (OHIP)</b>                                               | Ministry of Health and Long-Term Care        | The OHIP claims database contains information on inpatient and outpatient services provided to Ontario residents eligible for the province's publicly funded health insurance system by fee-for-service health care practitioners (primarily physicians) and "shadow billings" for those paid through non-fee-for-service payment plans. Billing codes on the claims (OHIP fee codes) identify the care provider, their area of specialization and the type and location of service. OHIP billing claims also contain a 3-digit diagnosis code - the main reason for the service - captured using a modified version of the ICD, 8th revision coding system. |
| <b>Immigration, Refugees, and Citizenship Canada's Permanent Resident database (IRCC)</b> | Immigration, Refugees and Citizenship Canada | The Ontario portion of the IRCC Permanent Resident Database includes immigration application records for people who initially applied to land in Ontario since 1985. The dataset contains permanent residents' demographic information such as country of citizenship, level of education, mother tongue, and landing date. New immigrants who are currently residing in Ontario but originally landed in another province are not captured in this dataset.                                                                                                                                                                                                 |

| Name                                   | Data Source                                      | Description                                                                                                                                                                                                                                                                                                                                                                                                                                                                                                                                                                                                                                                                                                                                                                                                                                                                                                                                                                                                                                                                                                                                                                                                                                                                                                                                                                                                                                                                                                                                                                                                                                                                                                  |
|----------------------------------------|--------------------------------------------------|--------------------------------------------------------------------------------------------------------------------------------------------------------------------------------------------------------------------------------------------------------------------------------------------------------------------------------------------------------------------------------------------------------------------------------------------------------------------------------------------------------------------------------------------------------------------------------------------------------------------------------------------------------------------------------------------------------------------------------------------------------------------------------------------------------------------------------------------------------------------------------------------------------------------------------------------------------------------------------------------------------------------------------------------------------------------------------------------------------------------------------------------------------------------------------------------------------------------------------------------------------------------------------------------------------------------------------------------------------------------------------------------------------------------------------------------------------------------------------------------------------------------------------------------------------------------------------------------------------------------------------------------------------------------------------------------------------------|
| <b>Ontario COPD Database (COPD)</b>    | Canadian Institute for Health Information (CIHI) | <p>The Ontario COPD Database is created using two separate algorithms applied to inpatient hospitalization (DAD), same day surgery (SDS) records, and physician billing claims (OHIP) data to determine the diagnosis date for incident cases of chronic obstructive pulmonary disease in Ontario.</p> <p>In an algorithm which maximizes sensitivity, the definition for COPD is any physician billing claim with a diagnosis for COPD (OHIP diagnosis codes: 491, 492, 496) or any inpatient hospitalization or same day surgery record with a diagnosis for COPD (ICD-9 diagnosis codes: 491, 492, 496; ICD-10 diagnosis codes: J41- J44; in any diagnostic code space). When using expert panel review of primary care charts as the reference standard, this definition has been shown to have the following performance characteristics: Sensitivity (85.0%), Specificity (78.4%), Positive Predictive Value (57.5%), and Negative Predictive Value (93.8%).(7)</p> <p>In an algorithm which maximizes specificity, the definition for COPD is <math>\geq 3</math> physician billing claims with a diagnosis for COPD (OHIP diagnosis codes: 491, 492, 496) or <math>\geq 1</math> inpatient hospitalization or same day surgery record with a diagnosis for COPD (ICD-9 diagnosis codes: 491, 492, 496; ICD-10 diagnosis codes: J41, J42, J43, J44; in any diagnostic code space) in a two-year period. When using expert panel review of primary care charts as the reference standard, this definition has been shown to have the following performance characteristics: Sensitivity (57.5%), Specificity (95.4%), Positive Predictive Value (81.3%), and Negative Predictive Value (86.7%).(1)</p> |
| <b>Ontario Diabetes Database (ODD)</b> | Canadian Institute for Health Information (CIHI) | <p>The ODD is created using algorithms applied to inpatient hospitalization (DAD) records, same day surgery (SDS) records, and physician billing claims (OHIP) data to determine the diagnosis date for incident cases of diabetes in Ontario. For adults aged 19 years and greater, the definition for diabetes is 2 physician billing claims with a diagnosis for diabetes (OHIP diagnosis code: 250) or 1 inpatient hospitalization or same day surgery record with a diagnosis for diabetes (ICD-9 diagnosis code: 250; ICD-10 diagnosis codes: E10, E11, E13, E14; in any diagnostic code space) within a 2 year period. Physician claims and hospitalizations with a diagnosis of diabetes occurring within 120 prior to and 180 days after a gestational hospitalization record were excluded. When using primary care chart abstraction as the reference standard, this definition has been shown to have the following performance characteristics: Sensitivity (86.1%), Specificity (97.1%), Positive Predictive Value (79.8%), and Negative Predictive Value (98.1%).(2)</p>                                                                                                                                                                                                                                                                                                                                                                                                                                                                                                                                                                                                                      |

| Name                              | Data Source                                      | Description                                                                                                                                                                                                                                                                                                                                                                                                                                                                                                                                                                                                                                                                                                                                                                                                                                                                              |
|-----------------------------------|--------------------------------------------------|------------------------------------------------------------------------------------------------------------------------------------------------------------------------------------------------------------------------------------------------------------------------------------------------------------------------------------------------------------------------------------------------------------------------------------------------------------------------------------------------------------------------------------------------------------------------------------------------------------------------------------------------------------------------------------------------------------------------------------------------------------------------------------------------------------------------------------------------------------------------------------------|
| <b>Ontario CHF Database (CHF)</b> | Canadian Institute for Health Information (CIHI) | <p>The Ontario CHF Database is created using a definition of <math>\geq 2</math> physician billing claims with a diagnosis of congestive heart failure (OHIP diagnosis code: 428) and/or <math>\geq 1</math> inpatient hospitalization or same day surgery record with a diagnosis of congestive heart failure (ICD-9 diagnosis code: 428; ICD-10 diagnosis code: I50; in the primary diagnostic code space) in a two-year period applied to hospitalization (DAD), same day surgery (SDS), and physician billing claims (OHIP) data to determine the diagnosis date for incident cases of CHF in Ontario.</p> <p>When using electronic medical record data abstraction as the reference standard, the above definition has been demonstrated to have the following performance characteristics: Sensitivity (84.8%), Specificity (97.0%), and Positive Predictive Value (55.3%).(3)</p> |
| <b>Ontario HIV Database (HIV)</b> | Canadian Institute for Health Information (CIHI) | <p>The Ontario HIV Database contains all Ontario HIV positive patients identified since 1992. HIV positive patients are defined as persons having received at least 3 physician claims with OHIP diagnosis code 042, 043, or 044 within 3 years. The diagnosis date is the first of these claims, unless a prior OHIP record with the above diagnosis codes or a hospitalization having an ICD-10 diagnosis code of B20, B21, B22, B23, or B24 occurs earlier.</p> <p>This definition has been shown to have high sensitivity (96.2%) and specificity (99.6%)(4)</p>                                                                                                                                                                                                                                                                                                                     |

### Supplement Table 4: Variable Definitions

| Variable                              | Data Source                      | Definition Description                                                                                                                                                                                                                                                                                                                            |
|---------------------------------------|----------------------------------|---------------------------------------------------------------------------------------------------------------------------------------------------------------------------------------------------------------------------------------------------------------------------------------------------------------------------------------------------|
| Age                                   | RPDB                             | Age of the individual at the index date                                                                                                                                                                                                                                                                                                           |
| Sex                                   | RPDB                             | Sex of the individual                                                                                                                                                                                                                                                                                                                             |
| Rural status                          | RPDB                             | Resides in a rural area as defined as a settlement of <10 000 individuals                                                                                                                                                                                                                                                                         |
| Location (city)                       | RPDB                             | City in which the individual is believed to reside as of July 1 <sup>st</sup> of the index year, based on their census division information                                                                                                                                                                                                       |
| Recent immigrant                      | IRCC                             | Presence of a landing date in the Immigration, Refugees and Citizenship Canada Permanent Database indicates immigration to Ontario between 1985 to 2018                                                                                                                                                                                           |
| Date of immigration                   | IRCC                             | Time, in years, since immigration to Ontario from outside Canada occurred                                                                                                                                                                                                                                                                         |
| Refugee status                        | IRCC                             | Class of immigration status = Refugee                                                                                                                                                                                                                                                                                                             |
| Congestive heart failure              | CHF                              | Presence in the database indicates the individual has a history of congestive heart failure <sup>1</sup>                                                                                                                                                                                                                                          |
| Chronic obstructive pulmonary disease | COPD                             | Presence in the database indicates the individual has a history of COPD <sup>2</sup>                                                                                                                                                                                                                                                              |
| Diabetes                              | ODD                              | Presence in the database indicates the individual has a history of diabetes <sup>3</sup>                                                                                                                                                                                                                                                          |
| HIV status                            | HIV                              | Presence in the database indicates the individual is HIV positive <sup>4</sup> .                                                                                                                                                                                                                                                                  |
| Chronic kidney disease                | DAD,<br>NACRS,<br>OHIP           | 1 hospitalization or 3 ED visit or physician claims in 1 year within 3 years of the index date with any of the following eligible codes:<br>ICD-10: E102, E112, E132, E142, I12, I13, N00, N01, N02, N03, N04, N05, N06, N07, N08, N1, N20, N21, N22, N23<br>OHIP dx: 403, 585                                                                    |
| Chronic liver disease                 | DAD,<br>NACRS,<br>OHIP           | 1 hospitalization, ED visit or physician claim within 3 years of the index date with any of the following eligible codes:<br>ICD-10: B16, B17, B18, B19, B942, E830, E831, I85, K70, K713, K714, K715, K717, K721, K729, K73, K74, K753, K754, K758, K759, K76, K77, R160, R162, R17, R18, Z225<br>OHIP dx: 070, 571, 573<br>OHIP fee: Z551, Z554 |
| Psychosis related mental health care  | DAD,<br>NACRS,<br>OMHRS,<br>OHIP | 1 hospitalization, ED visit or physician claim within 1 year of the index date with any of the following eligible codes:<br>ICD-10: F20, F22, F23, F24, F25, F28, F29<br>DSM-IV: 295, 297, 298<br>OHIP dx: 295, 297, 298                                                                                                                          |

| Variable                                                  | Data Source                      | Definition Description                                                                                                                                                                                                                                                |
|-----------------------------------------------------------|----------------------------------|-----------------------------------------------------------------------------------------------------------------------------------------------------------------------------------------------------------------------------------------------------------------------|
| <b>Non-psychotic disorders related mental health care</b> | DAD,<br>NACRS,<br>OMHRS,<br>OHIP | 1 hospitalization, ED visit or physician claim within 1 year of the index date with any of the following eligible codes:<br>ICD-10: F30, F31, F32, F33, F34, F38, F39, F40, F41, F42, F43, F48, F60, F93<br>DSM-IV: 296, 300, 301<br>OHIP dx: 296, 300, 301, 309, 311 |
| <b>Substance use related mental health care</b>           | DAD,<br>NACRS,<br>OMHRS,<br>OHIP | 1 hospitalization, ED visit or physician claim within 1 year of the index date with any of the following eligible codes:<br>ICD-10: F10, F11, F12, F13, F14, F15, F16, F17, F18, F19, F55<br>DSM-IV: 291, 292, 303, 304, 305<br>OHIP dx: 291, 292, 303, 304, 305      |
| <b>Outpatient visits</b>                                  | OHIP                             | Number of physician visits within 1 year prior to the index date, defined as one visit per day per physician                                                                                                                                                          |
| <b>Emergency department visits</b>                        | NACRS                            | Number of ED visits within 1 year prior to the index date                                                                                                                                                                                                             |
| <b>Hospitalizations</b>                                   | DAD                              | Number of admissions to acute care hospitals within 1 year prior to the index date.                                                                                                                                                                                   |

- (1) Gershon AS, Wang C, Guan J, Vasilevska-Ristovska J, Cicutto L, To T. Identifying individuals with physician diagnosed COPD in health administrative databases. *COPD* 2009; 6(5):388-394.
- (2) Hux JE, Ivis F, Flintoft V, Bica A. Diabetes in Ontario: determination of prevalence and incidence using a validated administrative data algorithm. *Diabetes Care* 2002; 25(3):512-516.
- (3) Schultz SE, Rothwell DM, Chen Z, Tu K. Identifying cases of congestive heart failure from administrative data: a validation study using primary care patient records. *Chronic Dis Inj Can* 2013; 33(3):160-166.
- (4) Tony Antoniou, Brandon Zagorski, Mona R. Loutfy, Carol Strike, Richard H. Glazier. Validation of Case-Finding Algorithms Derived from Administrative Data for Identifying Adults Living with Human Immunodeficiency Virus Infection. *Plos One*. 2011;6(6):e21748. Epub 2011 Jun 30.

## Supplement Table 5 – Validation Statistic Formulae

The following diagnostic tests were used to assess the validity of each case ascertainment algorithm.

| Validation Statistic      | Formula                           |
|---------------------------|-----------------------------------|
| Sensitivity               | $TP / (TP + FN)$                  |
| Specificity               | $TN / (FP + TN)$                  |
| Positive Predictive Value | $TP / (TP + FP)$                  |
| Negative Predictive Value | $TN / (FN + TN)$                  |
| Positive Likelihood Ratio | $Sensitivity / (1 - Specificity)$ |

TP=True positive (truly experiencing homelessness and flagged as homeless by the case ascertainment algorithm)

FP=False positive (truly housed but flagged as homeless by the case ascertainment algorithm)

FN=False negative (truly experiencing homelessness but not flagged as homeless by the case ascertainment algorithm)

TN=True negative (truly housed and flagged as housed by the case ascertainment algorithm)

## Supplement Table 6 – Additional Tables

**Table 6A – Characteristics of true positives, false positives and false negatives using the optimal housing episode algorithm**

|                                                    | <b>True Positives<br/>(N=613)</b> | <b>False Positives<br/>(N=595)</b> | <b>False Negatives<br/>(N=2,830)</b> |
|----------------------------------------------------|-----------------------------------|------------------------------------|--------------------------------------|
| <b>Episodes without encounters, n (% of group)</b> | 0 (0%)                            | 0 (0%)                             | 1,825 (64.5%)                        |
| <b>Cohort source = HHIT study, n (% of group)</b>  | 613 (100%)                        | 397 (66.7%)                        | 2,830 (100%)                         |

Optimal housing episode algorithm = 1 CIHI indicator +/-45 days of the housing episode start and end dates

**Table 6B – Characteristics of true positives, false positives and false negatives using the (non-scalable) optimal annual housing experience algorithm**

|                                                    | <b>True Positives<br/>(N=701)</b> | <b>False Positives<br/>(N=365)</b> | <b>False Negatives<br/>(N=1,589)</b> |
|----------------------------------------------------|-----------------------------------|------------------------------------|--------------------------------------|
| <b>Episodes without encounters, n (% of group)</b> | 0 (0%)                            | 0 (0%)                             | 997 (62.7%)                          |
| <b>Cohort source = HHIT study, n (% of group)</b>  | 701 (100%)                        | 115 (31.5%)                        | 2,830 (100%)                         |

Optimal annual housing experience algorithm = 1 CIHI indicator +/-15 days of the calendar year start and end dates or one postal code from PSTLYEAR

**Table 6C – Number of adult Ontarians identified as experiencing homelessness by the optimal annual housing experience algorithm between 2007 and 2016**

| <b>Year</b>                                        | <b># identified (95% CI)</b> | <b>Adult ON Population</b> | <b>Unadjusted Rate (95% CI)</b> |
|----------------------------------------------------|------------------------------|----------------------------|---------------------------------|
| <b>2007</b>                                        | 7,012 (6,850-7,178)          | 9,995,143                  | 0.07% (0.069% - 0.072%)         |
| <b>2008</b>                                        | 7,271 (7,106-7,440)          | 10,125,078                 | 0.072% (0.07% - 0.073%)         |
| <b>2009</b>                                        | 7,318 (7,152-7,488)          | 10,250,718                 | 0.071% (0.07% - 0.073%)         |
| <b>2010</b>                                        | 7,934 (7,761-8,110)          | 10,393,961                 | 0.076% (0.075% - 0.078%)        |
| <b>2011</b>                                        | 8,521 (8,342-8,704)          | 10,529,817                 | 0.081% (0.079% - 0.083%)        |
| <b>2012</b>                                        | 9,028 (8,844-9,216)          | 10,699,090                 | 0.084% (0.083% - 0.086%)        |
| <b>2013</b>                                        | 9,202 (9,016-9,392)          | 10,859,071                 | 0.085% (0.083% - 0.086%)        |
| <b>2014</b>                                        | 9,769 (9,577-9,965)          | 11,001,544                 | 0.089% (0.087% - 0.091%)        |
| <b>2015</b>                                        | 10,658 (10,458-10,862)       | 11,117,135                 | 0.096% (0.094% - 0.098%)        |
| <b>2016</b>                                        | 11,731 (11,521-11,945)       | 11,287,810                 | 0.104% (0.102% - 0.106%)        |
| <b>Total individuals identified over 10 years</b>  |                              |                            | <b>54,873</b>                   |
| <b>Individuals present in &gt; 1 year estimate</b> |                              |                            | <b>18,217 (33.2% of total)</b>  |

Adult ON Population derived from Ontario inter-censal population estimates.

Optimal annual housing experience algorithm = 1 CIHI indicator +/-15 days of the calendar year start and end dates.

Confidence intervals calculated using the Wilson score method.
